# Supplementary material for: In situ S-doped ultrathin gC3N4 nanosheets coupled with mixed-dimensional (3D/1D) nanostructures of silver vanadates for enhanced photocatalytic degradation of organic pollutants
Source: Royal Society of Chemistry journal article supplement (doi:10.1039/c9nj01353a), 2019-01-01
Supplement: c9nj01353a1.pdf [file c9nj01353a1.pdf]

## Supporting Information

### In-situ S-doped ultrathin $gC_3N_4$ nanosheet coupled with mixed- dimensional (3D/1D) nanostructures of silver vanadates for enhanced photocatalytic degradation of organic pollutants

Subi Joseph<sup>1</sup>, Sinoj Abraham<sup>2</sup>, Ragam N Priyanka<sup>1</sup>, Thomas Abraham<sup>1</sup>, Arya Suresh<sup>1</sup>, Beena Mathew<sup>1\*</sup>

1. School of Chemical Sciences, Mahatma Gandhi University, Kottayam-686560, Kerala, India.  
Email: beenams@cs@gmail.com;

2. Mechanical Engineering Department, University of Alberta, Edmonton, Alberta, Canada – T6G 2V4. E-mail: sinoj@ualberta.ca

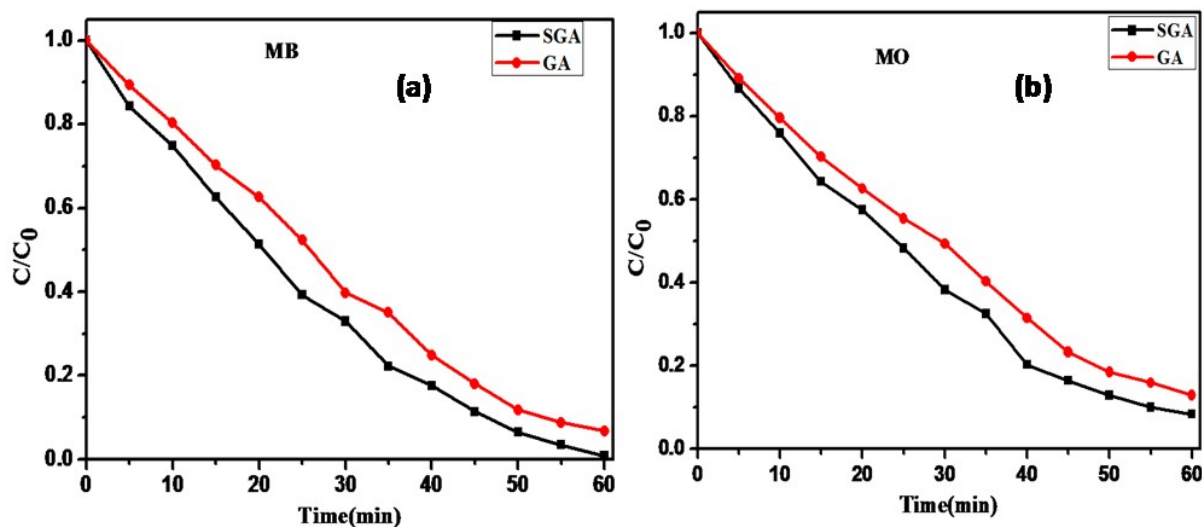

Figure S1- Photocatalytic degradation of (a) MB and (b) MO with S- $gC_3N_4/Ag_3VO_4$  (SGA) and  $gC_3N_4/Ag_3VO_4$  (GA)

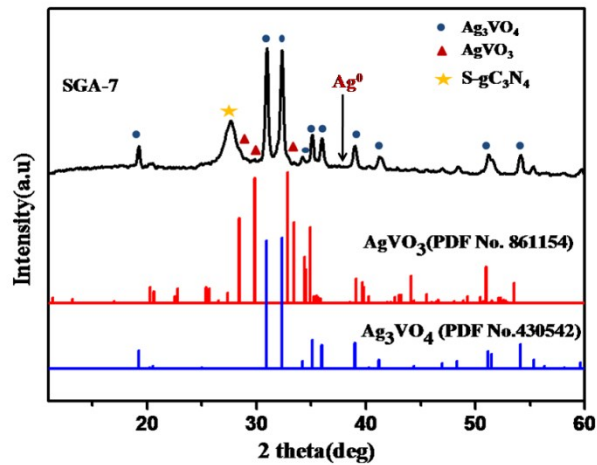

Figure S2 - XRD pattern showing the formation of  $\beta$ -AgVO<sub>3</sub>

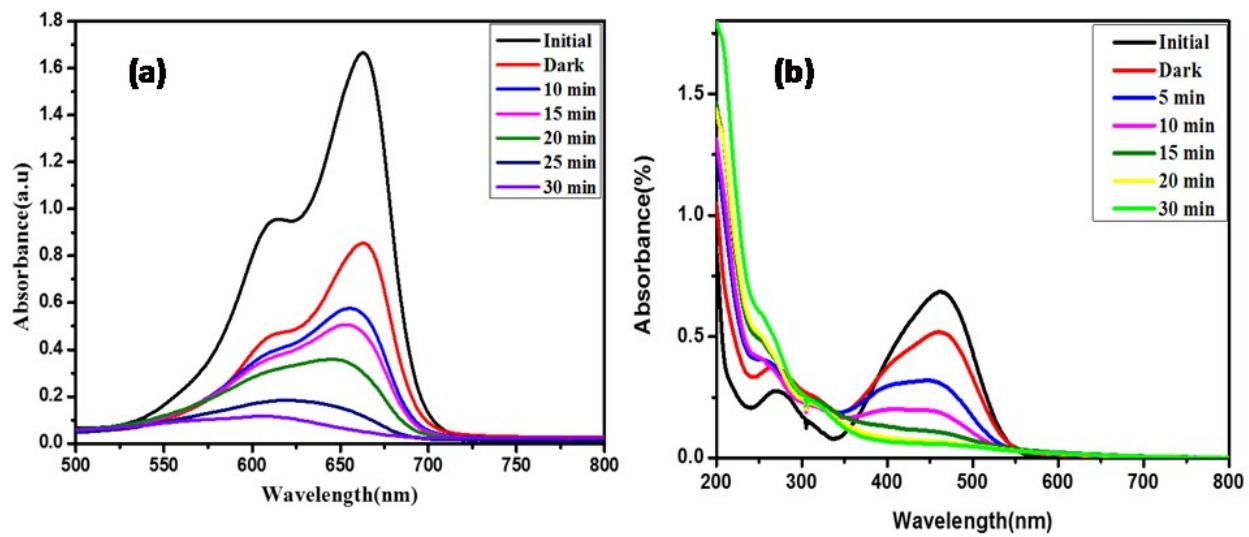

Fig. S3. Temporal absorption spectral pattern of (e) MB and (f) MO.

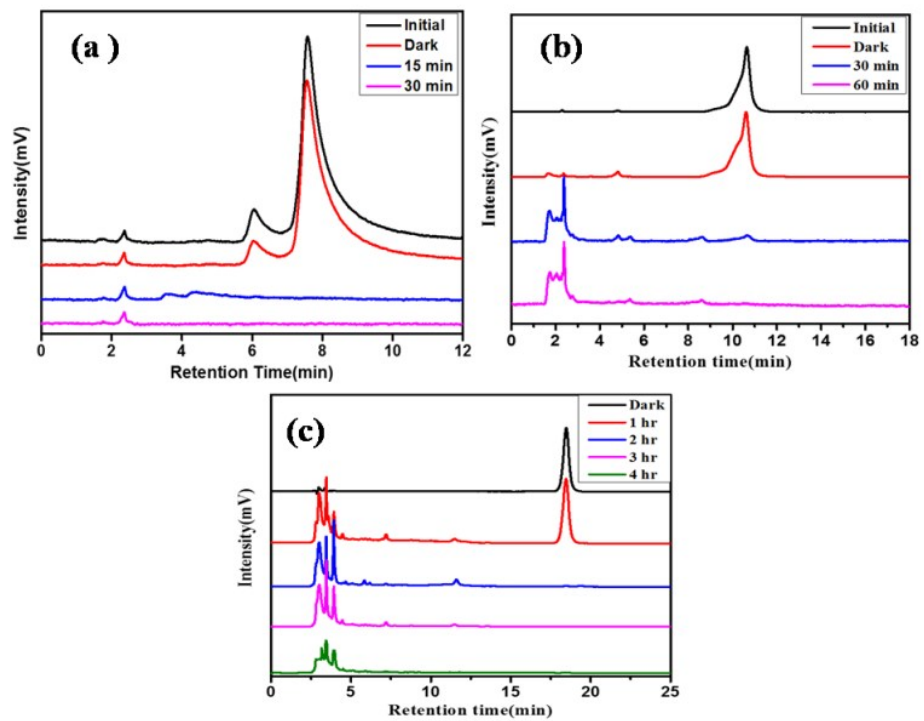

Figure S4 - HPLC chromatograms for the degradation of (a) MB , (b) MO and (c) 2,4-D

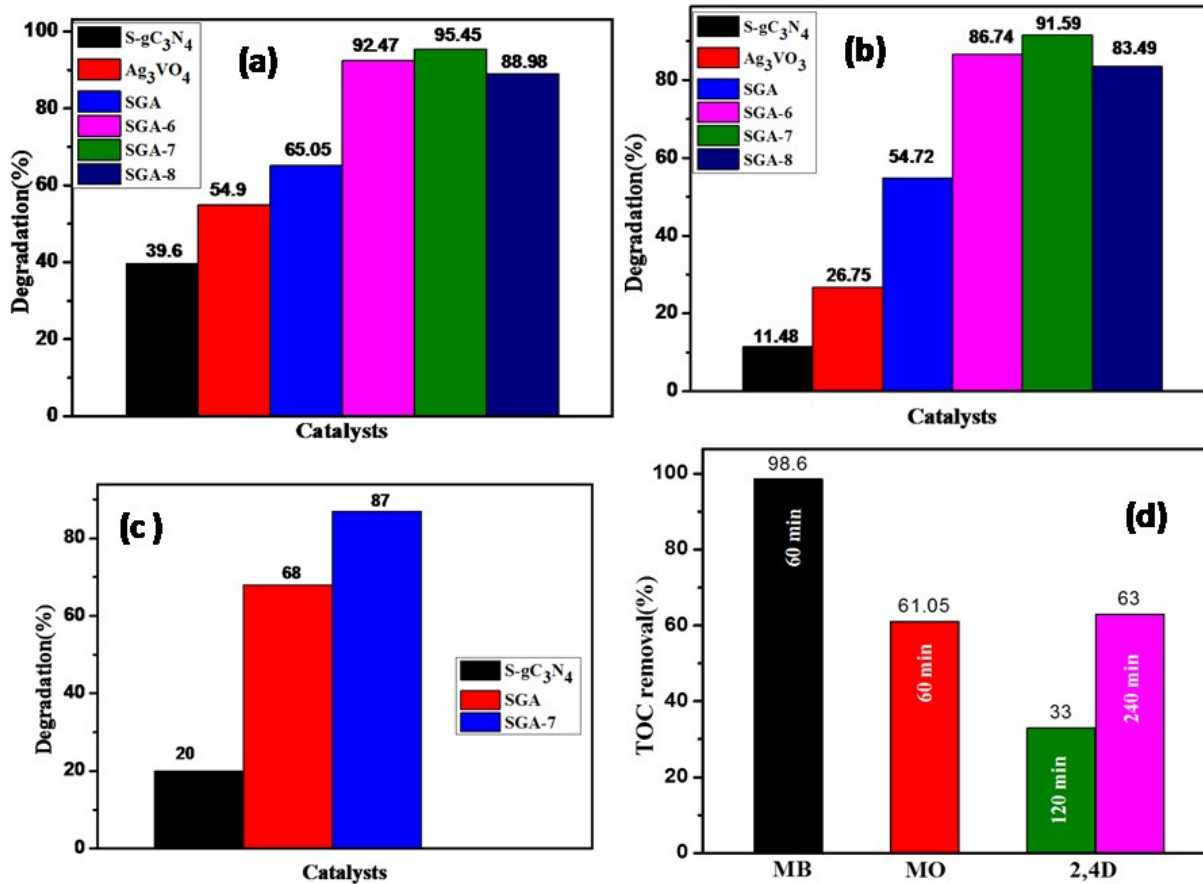

Fig. S5. Percentage degradation of (a) MB, (b) MO, and (c) 2, 4-D; (d) TOC removal rate of SGA-7

Table 1. S6. Comparison of photocatalytic activity of SGA-7 with previous literatures

| <b>Amount of catalyst/<br/>Target pollutant</b>                         | <b>Light Source</b>            | <b>Removal<br/>percentage</b>                                               | <b>References</b>                |
|-------------------------------------------------------------------------|--------------------------------|-----------------------------------------------------------------------------|----------------------------------|
| 0.05g catalyst,<br>100 ml MB(10 mg/L)                                   | 300W Xenon<br>lamp             | 85%(30 min)                                                                 | Zhu et al.,2015[65]              |
| 0.1g catalyst,<br>50 ml MB(10 mg/L)                                     | 150 W tungsten<br>halogen lamp | 94% (120 min)                                                               | Vadivel et al.,2016[66]          |
| 50 mg catalyst,<br>250 ml MB(3mg/L)                                     | Visible light                  | 100%(90 min)                                                                | Mao et al.,201[67]               |
| MB(7 mg/L)                                                              | Solar light                    | 100%(120 min)                                                               | Sacco et al.,2018[68]            |
| 30 mg catalyst,<br>50 ml MB(5 mg/L),<br>MO(6 mg/L)                      | Xe lamp                        | MB-100%(60 min)<br>MO-84.4%(60 min)                                         | Junlei Zhang et al.,2017<br>[69] |
| 0.15g catalyst,<br>150 ml MO(15 mg/L)                                   | 300-W tungsten<br>bulb         | 92 % (45 min)                                                               | Rong Ran et al.,2016<br>[70]     |
| 0.05 g catalyst,<br>100 ml MB (10 mg/L)                                 | 300 W Xe lamp                  | 85% (30 min)                                                                | Tingting Zhu et al.,2015<br>[71] |
| 20 mg catalyst,<br>20 ml MO(20 mg/L)                                    | Xe arc lamp                    | 92 % (140 min)                                                              | Haidong Li et al.,2017<br>[72]   |
| 0.2g /L catalyst,<br>2,4 D(50 mg/L)                                     | UV light                       | 96%(120 min)                                                                | Nagashree et<br>al.,2018[73]     |
| 0.2g/L catalyst,<br>2,4 D(10 mg/L)                                      | UV light                       | 48.06%(240 min)                                                             | Razani et al.,2017[73]           |
| 50 mg catalyst,<br>50 ml 2,4 D(0.5mM)                                   | 200 W<br>Hg-Xe lamp            | 18%(60 min)                                                                 | Lee et al.,2017[75]              |
| 50 mg catalyst,<br>100 ml MB(10 mg/L),<br>MO(10 mg/L),2,4 D(20<br>mg/L) | Solar light                    | MB - 95.45%<br>(30min)<br>MO - 91.6% (30<br>min)<br>2,4 D -87% (120<br>min) | <b>This work</b>                 |

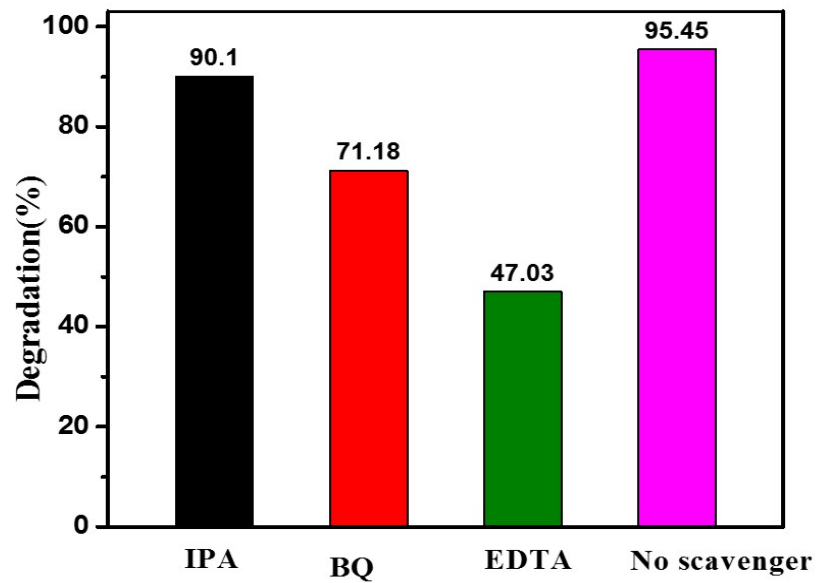

Fig. S7. Scavenger effect on the percentage of degradation of MB with SGA-7
